# Supplementary material for: Complexing Methylene Blue with Phosphorus Dendrimers to Increase Photodynamic Activity
Source: MDPI journal article supplement (doi:10.3390/molecules22030345), 2017-02-23
Supplement: s1 [file s1]

# Complexing Methylene Blue with Phosphorus Dendrimers to Increase Photodynamic Activity

Monika Dabrzalska, Anna Janaszewska, Maria Zablocka, Serge Mignani,  
Jean Pierre Majoral and Barbara Klajnert-Maculewicz

**Table S1.** Viability (% of control) of ASZ cell line after the treatment with MB and MB-1an without irradiation (dark toxicity).

| MB [ $\mu$ M] | MB               | MB-1an            |
|---------------|------------------|-------------------|
| 1.0           | 87.62 $\pm$ 5.30 | 79.33 $\pm$ 14.14 |
| 2.5           | 82.88 $\pm$ 6.50 | 79.34 $\pm$ 8.51  |
| 5.0           | 82.39 $\pm$ 3.21 | 78.01 $\pm$ 6.13  |
| 10.0          | 68.14 $\pm$ 8.56 | 68.31 $\pm$ 13.07 |

**Table S2.** Viability (% of control) of BSZ cell line after the treatment with MB and MB-1an without irradiation (dark toxicity).

| MB [ $\mu$ M] | MB               | MB-1an            |
|---------------|------------------|-------------------|
| 1.0           | 86.85 $\pm$ 0.29 | 92.36 $\pm$ 10.24 |
| 2.5           | 82.83 $\pm$ 0.85 | 94.55 $\pm$ 8.56  |
| 5.0           | 74.49 $\pm$ 1.57 | 87.27 $\pm$ 4.74  |
| 10.0          | 54.87 $\pm$ 5.19 | 62.31 $\pm$ 11.62 |

**Table S3.** Viability (% of control) of CSZ cell line after the treatment with MB and MB-1an without irradiation (dark toxicity).

| MB [ $\mu$ M] | MB                | MB-1an            |
|---------------|-------------------|-------------------|
| 1.0           | 93.03 $\pm$ 3.83  | 92.82 $\pm$ 7.78  |
| 2.5           | 84.47 $\pm$ 7.28  | 87.61 $\pm$ 8.39  |
| 5.0           | 81.79 $\pm$ 10.30 | 74.17 $\pm$ 11.05 |
| 10.0          | 74.19 $\pm$ 10.98 | 61.74 $\pm$ 4.36  |

**Table S4.** Viability (% of control) of ASZ, BSZ and CSZ cell lines after the treatment with 1an without irradiation.

| 1an [ $\mu$ M] | ASZ              | BSZ               | CSZ              |
|----------------|------------------|-------------------|------------------|
| 0.2            | 88.84 $\pm$ 5.40 | 88.88 $\pm$ 12.41 | 90.58 $\pm$ 3.47 |
| 0.5            | 88.36 $\pm$ 5.85 | 96.04 $\pm$ 11.33 | 84.74 $\pm$ 2.45 |
| 1.0            | 90.85 $\pm$ 8.92 | 93.00 $\pm$ 2.65  | 80.90 $\pm$ 2.21 |
| 2.0            | 78.58 $\pm$ 3.66 | 73.77 $\pm$ 14.22 | 65.55 $\pm$ 4.66 |

**Table S5.** Viability (% of control) of ASZ cell line after the treatment with different concentrations of MB and MB-1an after the 30 min irradiation.

| MB [ $\mu$ M] | MB               | MB-1an           |
|---------------|------------------|------------------|
| 1.0           | 83.4 $\pm$ 2.04  | 79.22 $\pm$ 3.21 |
| 2.5           | 83.71 $\pm$ 1.13 | 70.91 $\pm$ 4.49 |
| 5.0           | 80.55 $\pm$ 6.91 | 20.21 $\pm$ 5.07 |
| 10.0          | 59.55 $\pm$ 1.57 | 11.49 $\pm$ 5.50 |

**Table S6.** Viability (% of control) of BSZ cell line after the treatment with different concentrations of MB and MB-1an after the 30 min irradiation.

| MB [ $\mu$ M] | MB               | MB-1an           |
|---------------|------------------|------------------|
| 1.0           | 90.06 $\pm$ 4.57 | 79.29 $\pm$ 6.06 |
| 2.5           | 76.17 $\pm$ 2.24 | 51.74 $\pm$ 5.33 |
| 5.0           | 51.35 $\pm$ 4.13 | 17.41 $\pm$ 3.71 |
| 10.0          | 29.37 $\pm$ 2.31 | 8.68 $\pm$ 3.35  |

**Table S7.** Viability (% of control) of CSZ cell line after the treatment with different concentrations of MB and MB-1an after the 30 min irradiation.

| MB [ $\mu$ M] | MB                | MB-1an            |
|---------------|-------------------|-------------------|
| 1.0           | 86.84 $\pm$ 11.15 | 80.65 $\pm$ 6.17  |
| 2.5           | 83.48 $\pm$ 8.86  | 69.55 $\pm$ 6.79  |
| 5.0           | 65.68 $\pm$ 4.25  | 24.03 $\pm$ 12.83 |
| 10.0          | 54.72 $\pm$ 5.64  | 9.95 $\pm$ 5.57   |
